# Supplementary material
Source: MDPI journal article supplement (https://www.mdpi.com/2071-1050/12/15/6232)
Supplement: s1 [file s1]

**List S1. Case studies focusing on or mentioning Hong Ha Commune, Thua Thien Hue Province, Vietnam, which were not referenced in the article**

Bessette, G. Isang Bagsak! Report of a training workshop on Participatory Development Communication for Community-Based Natural Resources Management; Hue University of Agriculture and Forestry, International Development Research Centre: Hue, Vietnam, 2002.

Mizuno, K.; Tanaka, U.; Shaw, R.; Kobayashi, H.; Shibata, S.; Kobayashi, M.; An, L.V. RS/GIS Application for community-based disaster prevention and environmental management in the Central Vietnam. In Proceedings of the 26th Asian Conference on Remote Sensing, ACRS 2005 and 2nd Asian Space Conference, ASC; Asian Association on Remote Sensing: Hanoi, Vietnam, 2005; pp. 1721–1725.

Thi, T.T.M. School-based disaster risk reduction approach in building resilience of primary education system in Central Vietnam. Doctoral thesis, Kyoto University: Kyoto, Japan, 2014.

Toan, N.H.; Preston, T.R. Evaluation of uncultivated vegetables for pigs kept in upland households. *Livestock Res. for Rur. Dev.* 2007, 19.
